# Supplementary material for: Prediction of Grinding Force by an Electroplated Grinding Wheel with Orderly-Micro-Grooves
Source: Springer Nature journal article supplement (doi:10.1186/s10033-023-00937-y), 2023-10-12
Supplement: MOESM1 [file 26175980]

## Sheet: Sheet1
TableS1. Predictions of grinding forces at different conditions
ap(um)	Total force (Fn) /N	Chip formation force (Fnc) /N	Frictional force (Fnf) /N	Plowing force (Fnp) N
10	36.3	25.1	7.6	3.64
15	53.5	37.66	10.7	5.14
20	70.44	50	13.9	6.58
25	87.2	62.7	16.33	7.92
30	103.9	74.88	19.66	9.36
35	120.4	87	21.2	10.6
40	136.9	100.3	24.7	11.8
(a) vs=31.4 m/s, vw=4 m/min
ap(um)	Total force (Ft) /N	Chip formation force (Ftc) /N	Frictional force (Ftf) /N	Plowing force (Ftp) N
10	11.9	8.36	2.67	0.87
15	17.54	12.5	3.85	1.25
20	23.1	16.7	4.84	1.59
25	28.6	20.82	5.8	1.9
30	34.1	24.64	6.72	2.24
35	39.6	29.3	7.71	2.57
40	45	33.44	8.61	2.87
(b) vs=31.4 m/s, vw=4 m/min
vw(m/min)	Total force (Fn) /N	Chip formation force (Fnc) /N	Frictional force (Fnf) /N	Plowing force (Fnp) N
2	49.3	37	6	5.7
3	75.8	56.4	11.8	7.6
4	103.9	75	18.6	9.4
5	133.2	97.1	26	9.9
6	163.78	112	38.8	12.2
7	195	128	50	14
(c) vs=31.4 m/s, ap=30 μm
vw(m/min)	Total force (Ft) /N	Chip formation force (Ftc) /N	Frictional force (Ftf) /N	Plowing force (Ftp) N
2	16	12.33	2	1.37
3	24.78	18.7	4.18	1.83
4	34	25.16	6.5	2.33
5	43	30	9.8	2.64
6	54	37.3	13.5	3.06
7	64.87	43.7	17.6	3.43
(d) vs=31.4 m/s, ap=30 μm
TableS2. Comparison of predicted and measured grinding forces
ap(um)	Experiment (Fn) /N	Predictive value (Fn) /N	Experiment (Ft) /N	Predictive value (Ft) /N
10	33.7	36.3	9.7	11.9
15	58.1	53.5	17.4	17.5
20	76.7	70.4	23	23.1
25	84.3	87.3	26	28.6
30	109.3	103.9	33	34.1
35	132.2	120.5	39	39.6
40	147.8	136.9	45	45
(a) vs=31.4 m/s, vw=4 m/min
vw(m/min)	Experiment (Fn) /N	Predictive value (Fn) /N	Experiment (Ft) /N	Predictive value (Ft) /N
2	75.94	49.26	21.49	15.98
3	91.1	75.86	27.9	24.78
4	109.3	103.86	33.41	34.1
5	126	133.77	37.69	43.9
6	145	163.77	41.29	54.16
7	177	195.63	49	64.87
(b) vs=31.4 m/s, ap=30 μm
